# Supplementary material for: The role of prickle proteins in vertebrate development and pathology
Source: Mol Cell Biochem. 2023 Jun 26;479(5):1199–221. doi: 10.1007/s11010-023-04787-z (PMC11116189; doi:10.1007/s11010-023-04787-z)
Supplement: Supplementary file 1 — Supplementary file1 (PDF 6014 KB) [file 11010_2023_4787_MOESM1_ESM.pdf]

## **Supplementary Information (SI)**

SI contains 6 Supplementary Figures, 1 Supplementary Tables, and the Legend

### **Supplementary Figure 1**

**Suppl. Fig. 1 is provided on page 2.**

**Supplementary Figure 1.** The multiple sequence alignment of 26 Prickle sequences. All the sequence elements including MLS, NLS, and the amino acid residues used in the text are highlighted. For more info about the procedure, go to the Data availability section.

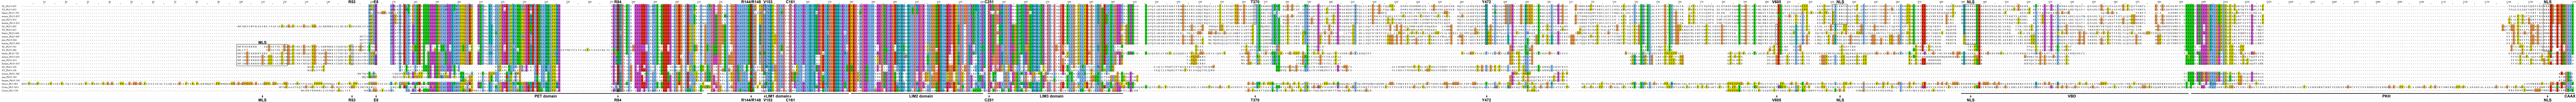

## Supplementary Figure 2

A

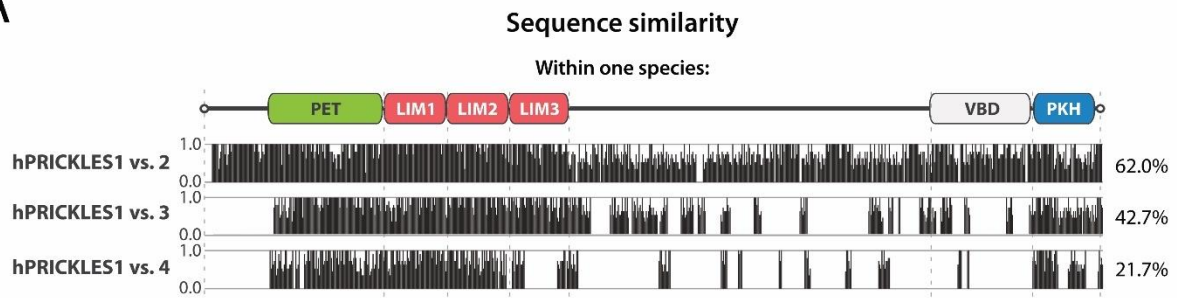

B

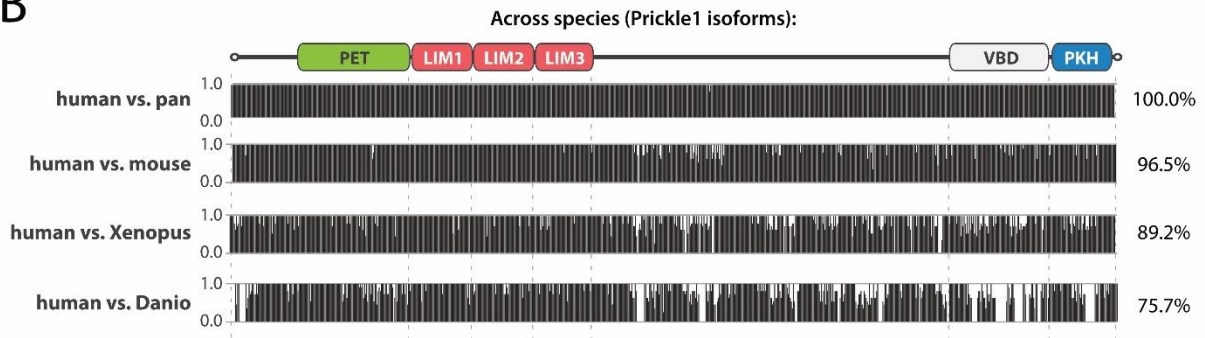

**Supplementary Figure 2. a)** Amino acid sequence conservation and similarity in individual human PRICKLE1-4, and **b)** Prickle1 isoforms across vertebrates. For more info about the procedure, go to the Data availability section.

## Supplementary Figure 3

PRICKLE 1

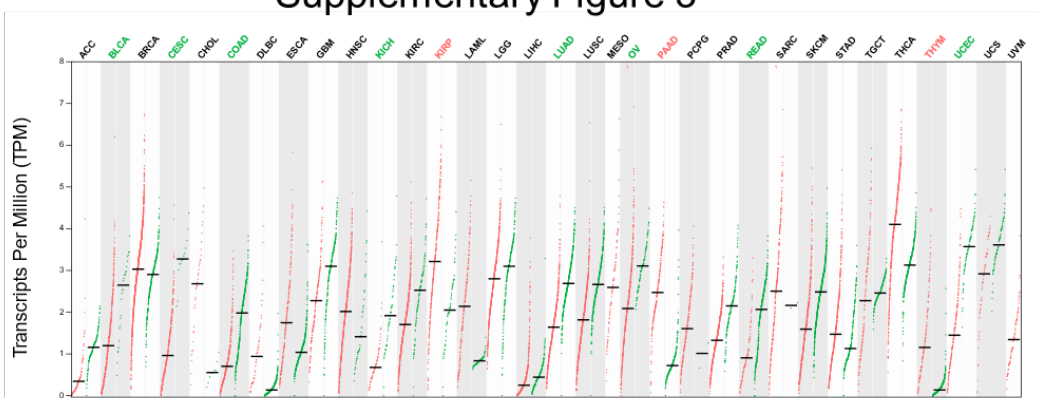

PRICKLE 2

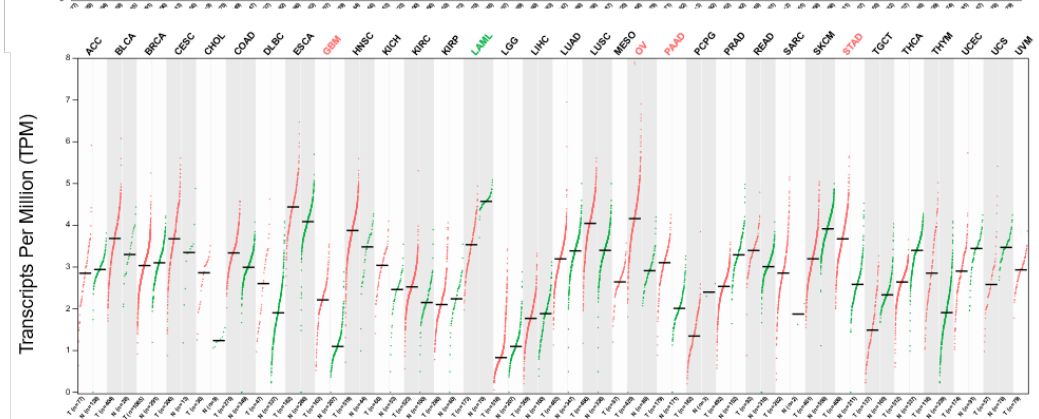

PRICKLE 3

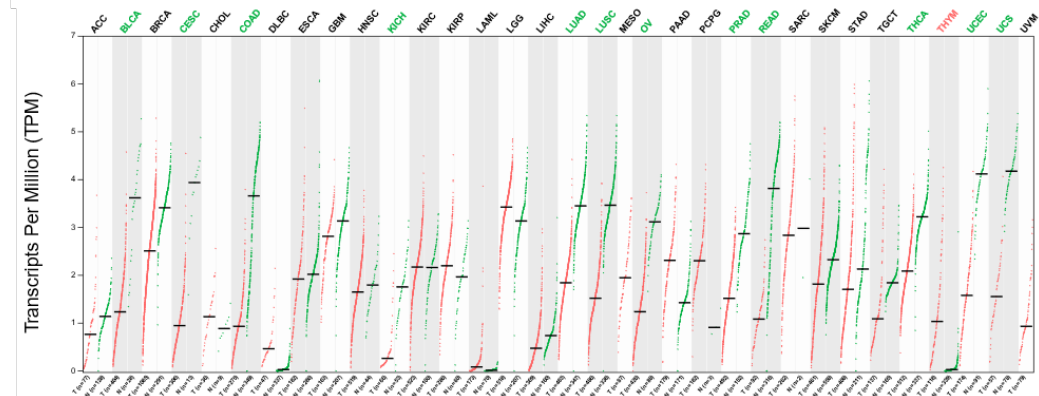

PRICKLE 4

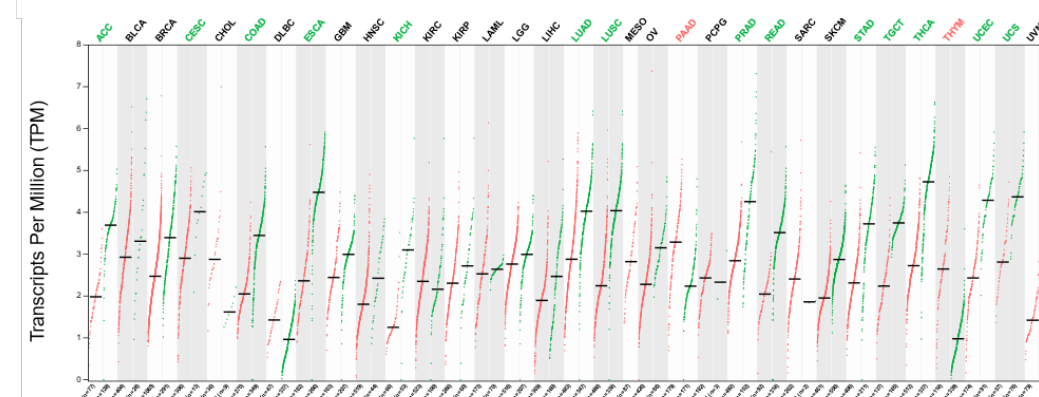

**Supplementary Figure 3.** *PRICKLE1-4* expression across cancer types in comparison with corresponding normal tissues. The column graph displays normal samples (N) as green and tumour (T) as red dots. Cohort size is shown (n). TCGA study abbreviations encoding cancers with significantly upregulated *PRICKLE* isoforms are highlighted in red and downregulated in green.

## Supplementary Figure 4

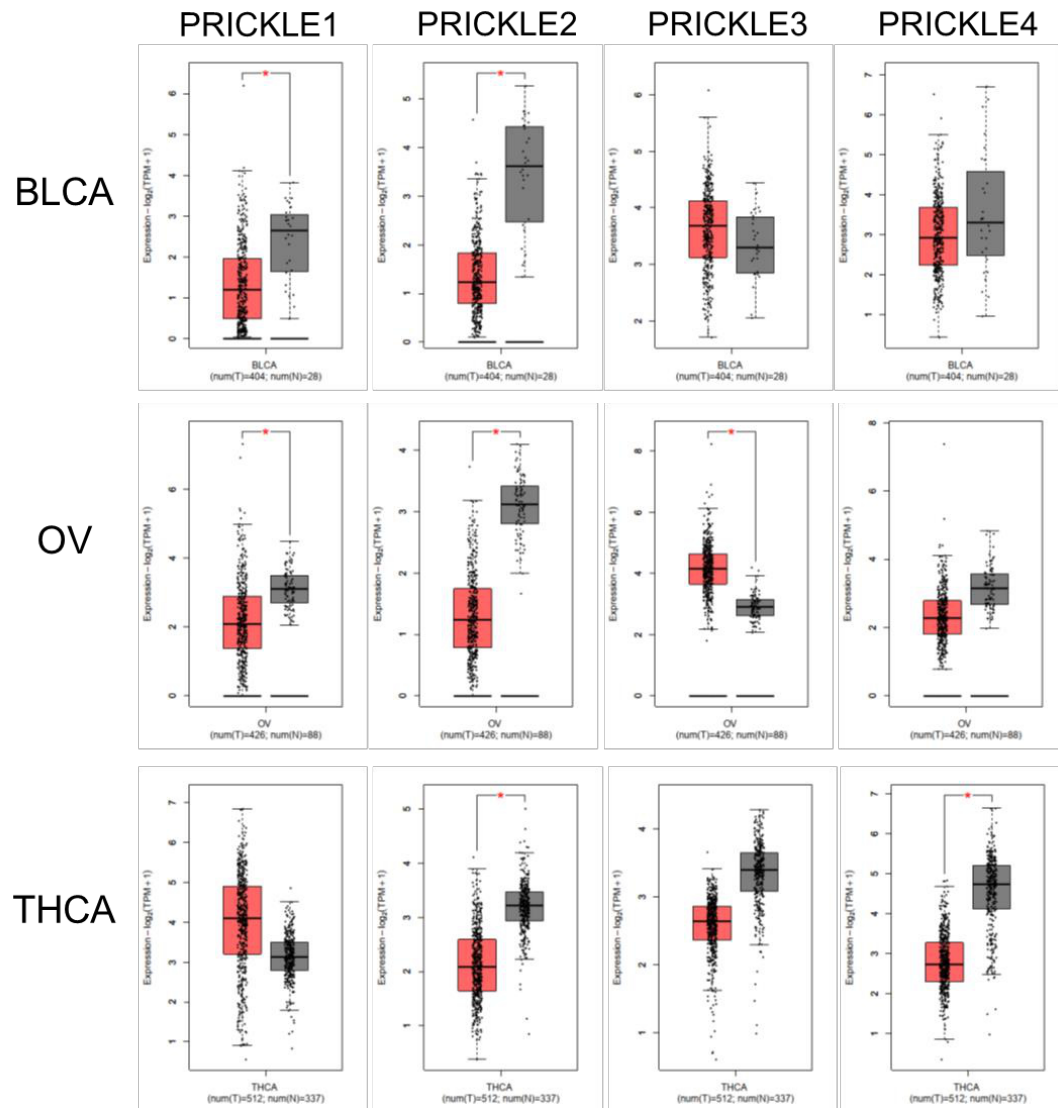

**Supplementary Figure 4.** Box plots – expression levels of *PRICKLE* isoforms in patients with Bladder Urothelial Carcinoma (BLCA), Ovarian serous cystadenocarcinoma (OV), and Thyroid carcinoma (THCA) were investigated; Tumour samples (T) represent a red box; health tissue a grey one.  
TPM – transcripts per million in the selected TCGA cancer types.

## Supplementary Figure 5

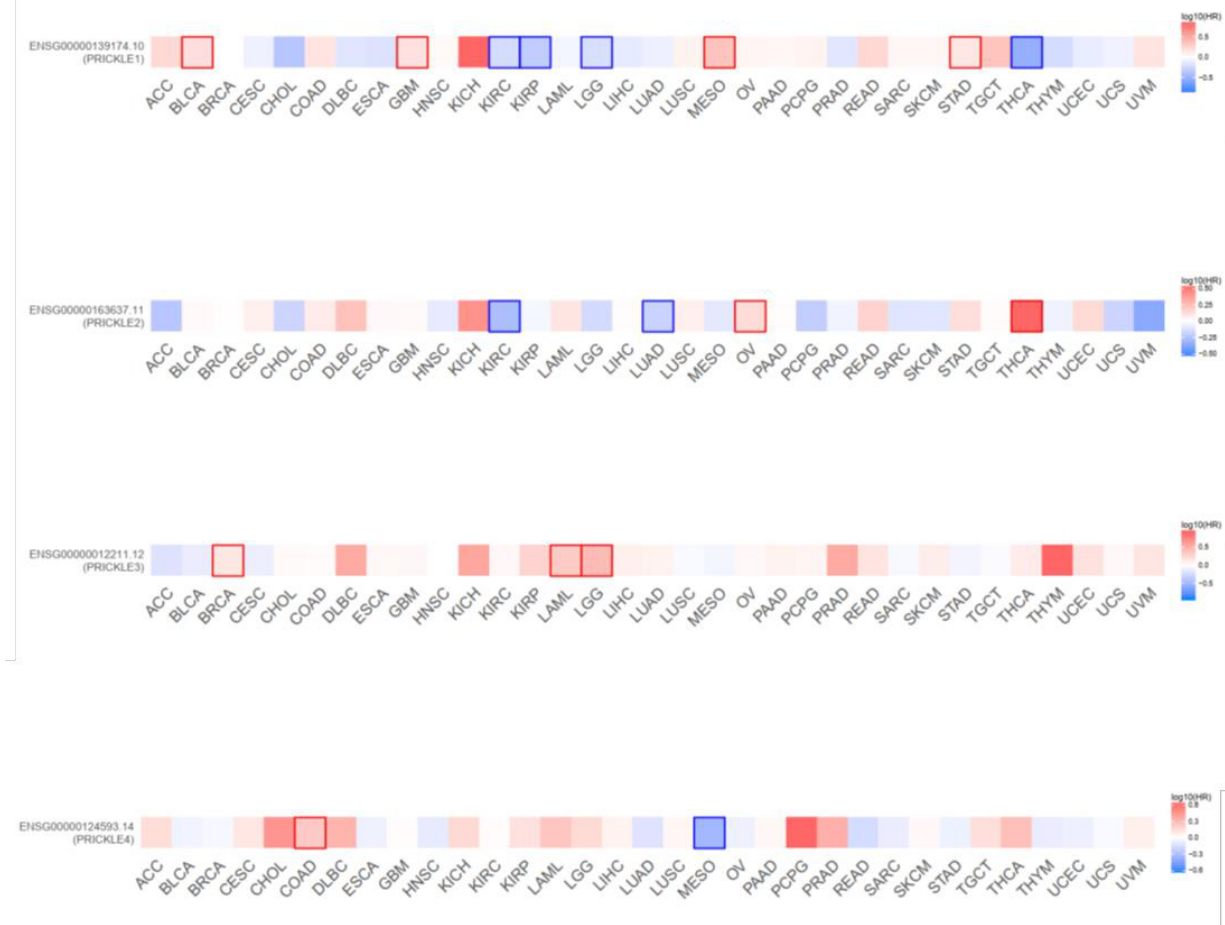

**Supplementary Figure 5.** Survival heat map of *PRICKLE1-4* across the TCGA dataset. The red blocks represent higher and blue blocks lower hazard risk, when gene expression is altered. Bold square frames indicate the statistical significance.

## Supplementary Figure 6

A)

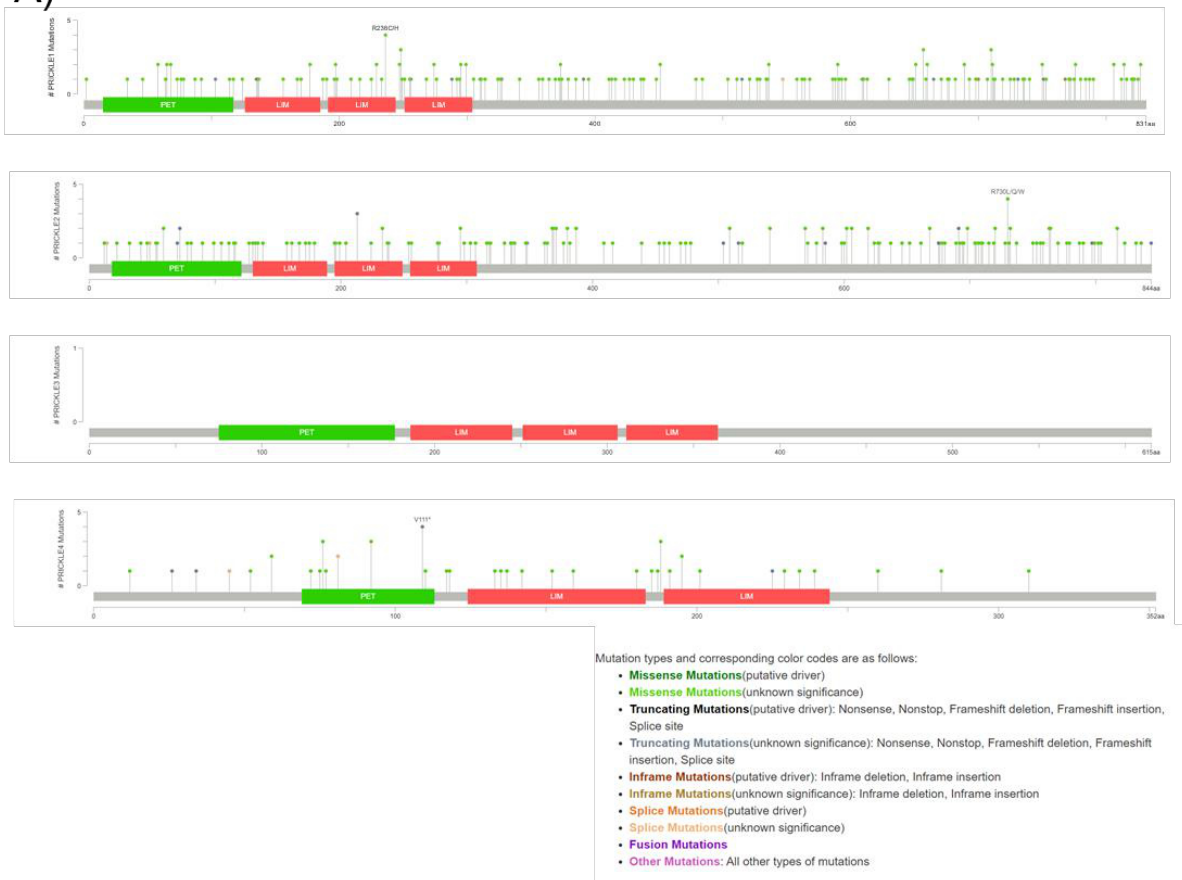

B)

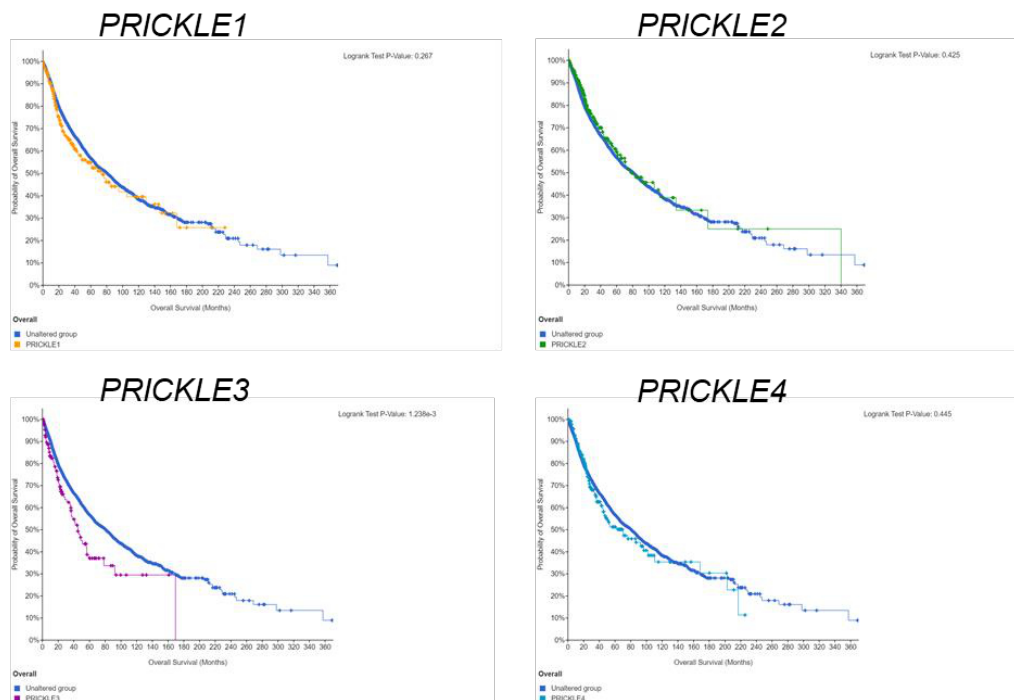

**Supplementary Figure 6. a)** Graphical summary of the nonsynonymous mutations identified in genes encoding PRICKLE isoforms in the TCGA dataset. Legend is shown below the image. **b)** Overall survival of cancer patients with or without germline or somatic mutations in *PRICKLE1-4* genes. Logrank test p-values are present in the graphs.

**Supplementary Table 1.** The list of TCGA abbreviations

|      |                                                                  |      |                                      |
|------|------------------------------------------------------------------|------|--------------------------------------|
| ACC  | Adrenocortical carcinoma                                         | LUAD | Lung adenocarcinoma                  |
| BLCA | Bladder Urothelial Carcinoma                                     | LUSC | Lung squamous cell carcinoma         |
| BRCA | Breast invasive carcinoma                                        | MESO | Mesothelioma                         |
| CESC | Cervical squamous cell carcinoma and endocervical adenocarcinoma | OV   | Ovarian serous cystadenocarcinoma    |
| CHOL | Cholangio carcinoma                                              | PAAD | Pancreatic adenocarcinoma            |
| COAD | Colon adenocarcinoma                                             | PCPG | Pheochromocytoma and Paraganglioma   |
| DLBC | Lymphoid Neoplasm Diffuse Large B-cell Lymphoma                  | PRAD | Prostate adenocarcinoma              |
| ESCA | Esophageal carcinoma                                             | READ | Rectum adenocarcinoma                |
| GBM  | Glioblastoma multiforme                                          | SARC | Sarcoma                              |
| HNSC | Head and Neck squamous cell carcinoma                            | SKCM | Skin Cutaneous Melanoma              |
| KICH | Kidney Chromophobe                                               | STAD | Stomach adenocarcinoma               |
| KIRC | Kidney renal clear cell carcinoma                                | TGCT | Testicular Germ Cell Tumors          |
| KIRP | Kidney renal papillary cell carcinoma                            | THCA | Thyroid carcinoma                    |
| LAML | Acute Myeloid Leukemia                                           | THYM | Thymoma                              |
| LGG  | Brain Lower Grade Glioma                                         | UCEC | Uterine Corpus Endometrial Carcinoma |
| LIHC | Liver hepatocellular carcinoma                                   | UCS  | Uterine Carcinosarcoma               |
|      |                                                                  | UVM  | Uveal Melanoma                       |
